# Supplementary material for: Ubiquitin E3 Ligase Ring1b/Rnf2 of Polycomb Repressive Complex 1 Contributes to Stable Maintenance of Mouse Embryonic Stem Cells
Source: PLOS journal article supplement (doi:10.1371/journal.pone.0002235), 2008-05-20

BiNGO analysis with outliers at day 1

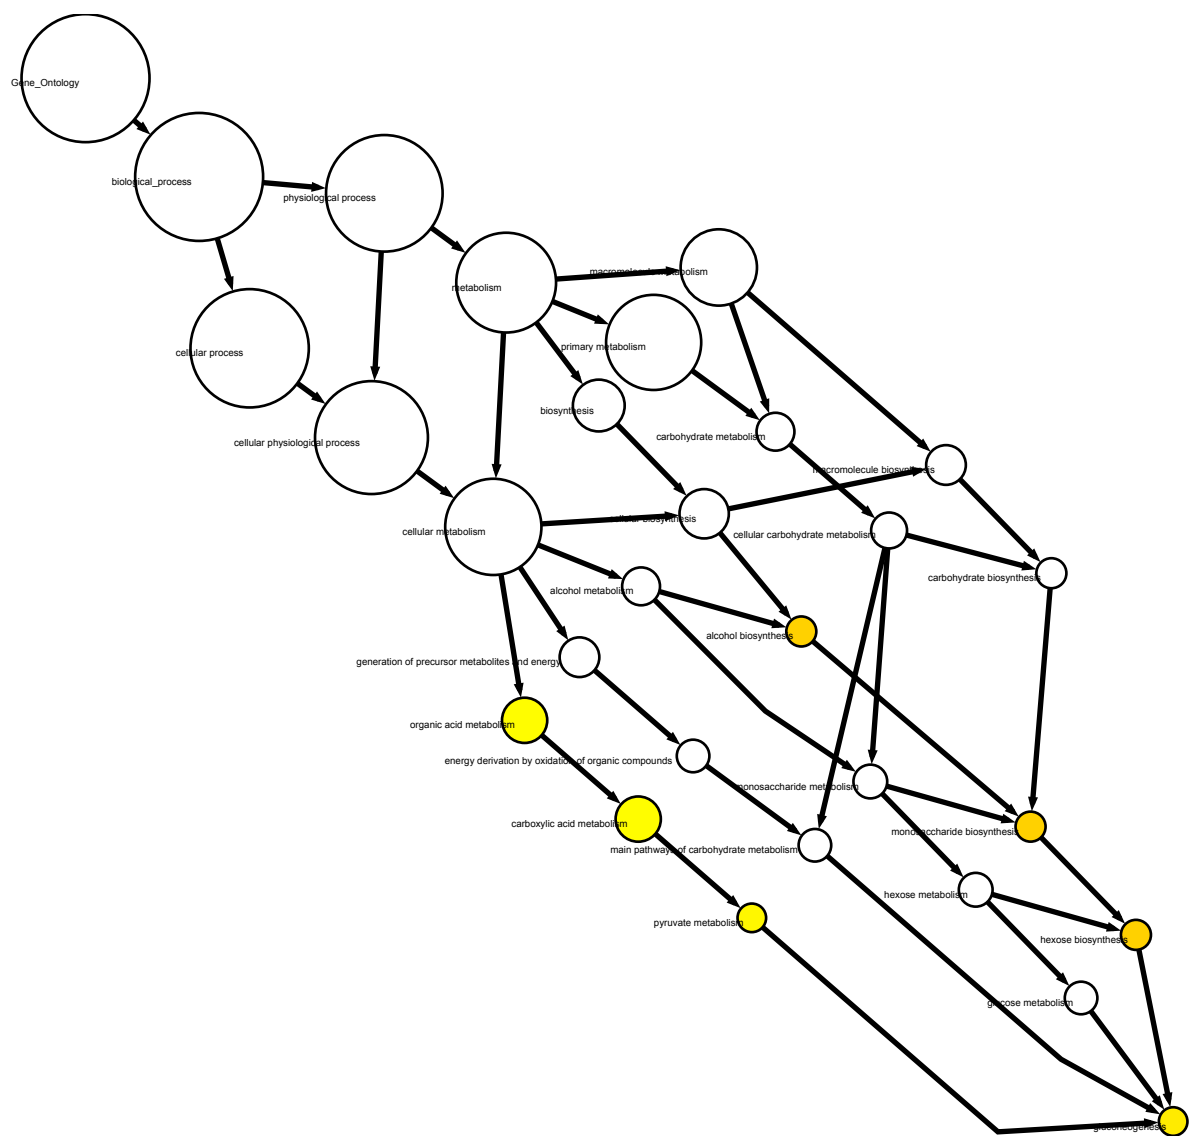

## BiNGO analysis with outliers at day 2

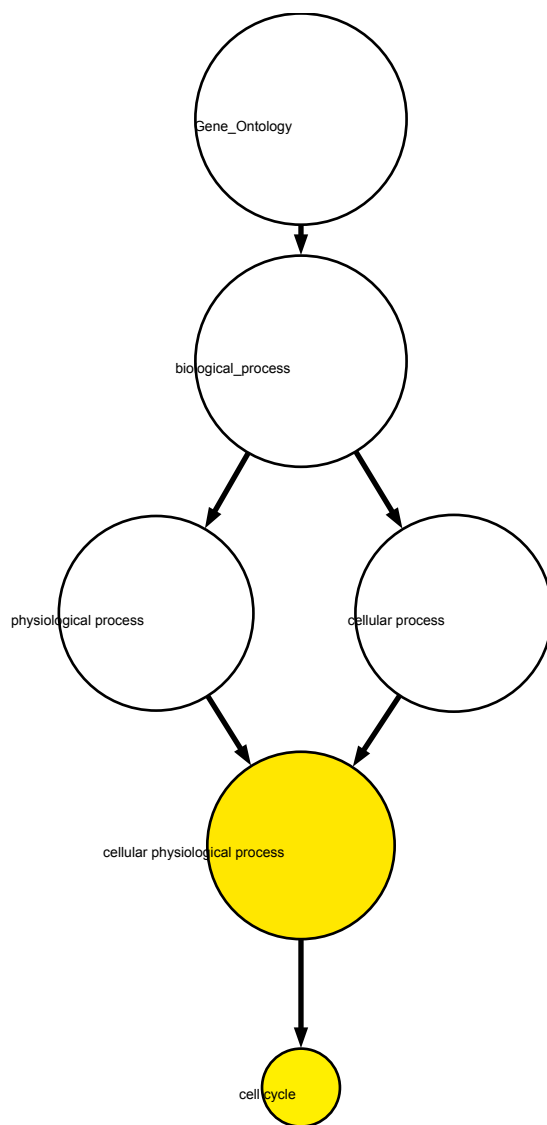

## BiNGO analysis with outliers at day 3

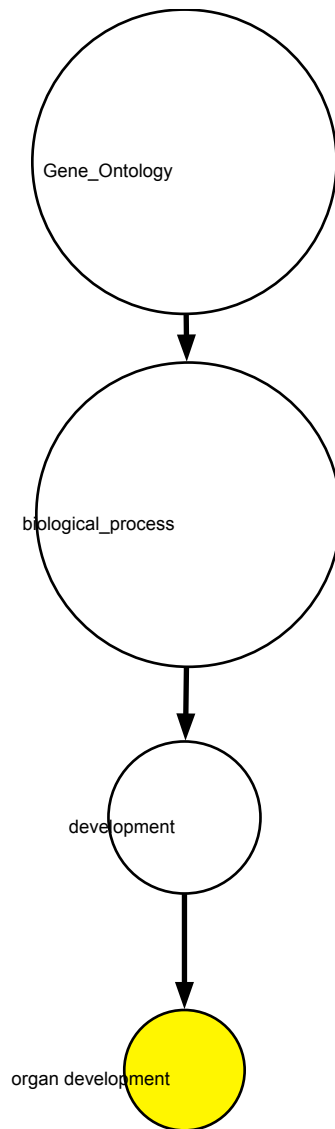

## BiNGO analysis with outliers at day 4

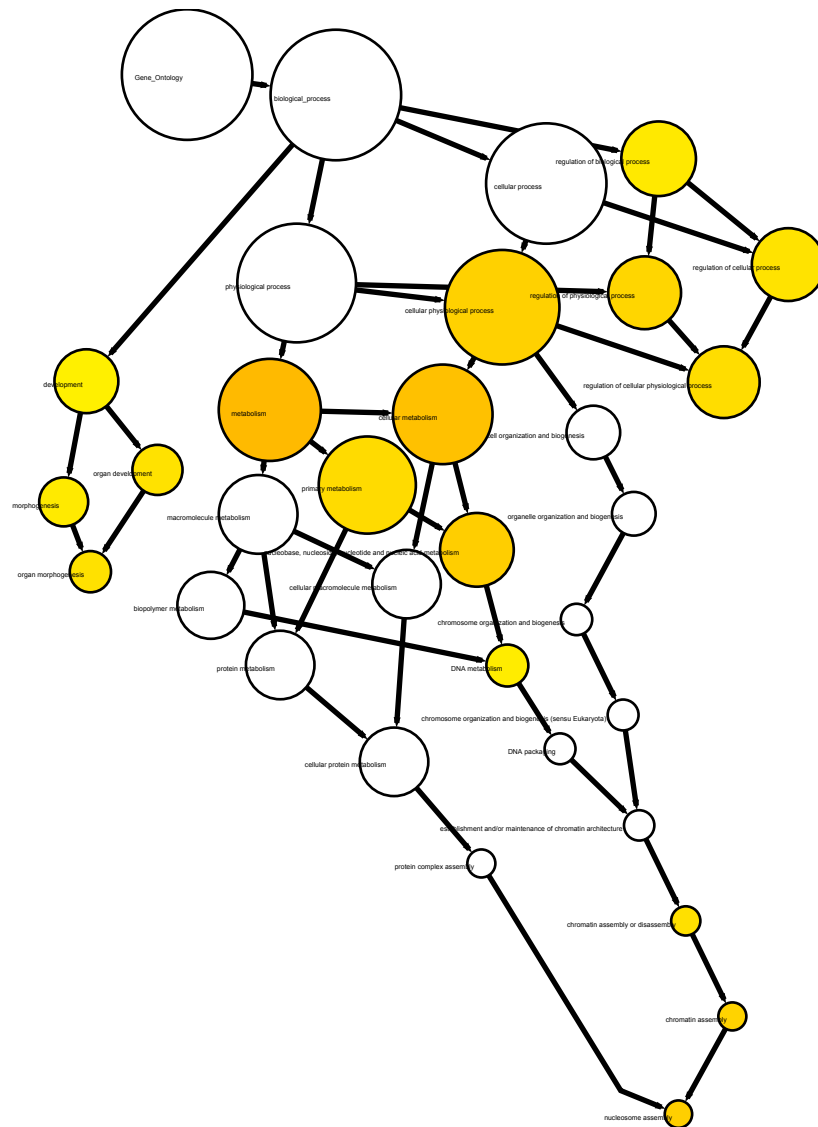

Supplement: S2 (10.1371/journal.pone.0002235.s002) [file journal.pone.0002235.s002]
