# Supplementary material for: Ubiquitin E3 Ligase Ring1b/Rnf2 of Polycomb Repressive Complex 1 Contributes to Stable Maintenance of Mouse Embryonic Stem Cells
Source: PLoS One. 2008 May 21;3(5):e2235. doi: 10.1371/journal.pone.0002235 (PMC2375055; doi:10.1371/journal.pone.0002235)
Supplement: Table S2 — BiNGO ontology analysis of genes deregulated in ES cells. Excel file of BiNGO analysis of all outliers based on EntrezIDs per day of 4-OHT treatment of Ring1b-/Lox;CreERT2 ES cells. (0.06 MB XLS) [file pone.0002235.s005.xls]

## Sheet: BiNGO day 1
File created with BiNGO (c) on 6-aug-2007 at 15:35:09
ontology: process
curator: GO
Selected ontology file : D:\Cytoscape 22\cytoscape-v2.2\plugins\BiNGO\GO_Biological_Process
Selected annotation file : D:\Cytoscape 22\cytoscape-v2.2\plugins\BiNGO\M_musculus_default
Overrepresentation
Selected statistical test : Hypergeometric test
Selected correction : Bonferroni Family-Wise Error Rate (FWER) correction
Selected significance level : 0.1
Testing option : Test cluster versus network
The selected cluster :
11472	11474	11639	11674	11803	11857	11910	11911	11992	12039	12068	12159	12176	12228	12334	12448	12577	12741	12745	12776	12799	12876	12889	12903	12921	13034	13056	13417	13435	13590	13591	13650	13723	13730	13808	13864	14114	14120	14130	14173	14181	14187	14219	14255	14268	14281	14314	14375	14472	14534
70561	70791	70951	71865	71885	71910	71934	71973	71994	72022	72042	72080	72102	72157	72248	72344	72378	72381	72503	72549	72572	72832	73166	73178	73333	73347	73614	73673	73852	74098	74174	74187	74206	74322	74405	74434	74551	74561	74747	75079	75339	75483	75801	76293	76467	76563	76886	76899	77011	77914
Number of genes selected : 285
Total number of genes in annotation : 10855
GO-ID	p-value	corr p-value# selected	# total	Description	Genes in test set
46165	1.9943e-06	0.0016612	6	16	alcohol biosynthesis	11910|11911|54128|21991|74551|14120
46364	1.9943e-06	0.0016612	6	16	monosaccharide biosynthesis	11910|11911|54128|21991|74551|14120
19319	1.9943e-06	0.0016612	6	16	hexose biosynthesis	11910|11911|54128|21991|74551|14120
6094	1.9854e-05	0.016538	5	14	gluconeogenesis	11910|11911|21991|74551|14120
6090	5.7512e-05	0.047908	5	17	pyruvate metabolism	11910|11911|21991|74551|14120
19752	9.7124e-05	0.080905	22	342	carboxylic acid metabolism	11910|11911|70791|12159|20431|353172|30935|70223|26458|20249|170439|74551|14120|70025|17768|69051|104923|21991|54635|107272|11992|20250
6082	9.7124e-05	0.080905	22	342	organic acid metabolism	11910|11911|70791|12159|20431|353172|30935|70223|26458|20249|170439|74551|14120|70025|17768|69051|104923|21991|54635|107272|11992|20250
[truncated: 205 more columns]

## Sheet: BiNGO day 2
File created with BiNGO (c) on 6-aug-2007 at 15:31:04
ontology: process
curator: GO
Selected ontology file : D:\Cytoscape 22\cytoscape-v2.2\plugins\BiNGO\GO_Biological_Process
Selected annotation file : D:\Cytoscape 22\cytoscape-v2.2\plugins\BiNGO\M_musculus_default
Overrepresentation
Selected statistical test : Hypergeometric test
Selected correction : Bonferroni Family-Wise Error Rate (FWER) correction
Selected significance level : 0.1
Testing option : Test cluster versus network
The selected cluster :
11306	11416	11474	11486	11752	11768	11803	11828	11847	11989	11991	11992	12116	12151	12162	12176	12190	12226	12227	12257	12292	12306	12310	12334	12373	12404	12449	12450	12545	12565	12577	12614	12739	12745	12776	12799	12946	12955	12974	13006	13033	13206	13209	13385	13404	13423	13435	13446	13518	13521
56454	57746	57785	57915	58203	58244	58801	59027	59033	59044	59290	60599	63954	63959	63986	64058	64103	64454	64705	65019	65970	66104	66168	66246	66259	66332	66365	66403	66431	66523	66531	66659	66860	66875	66887	66902	66949	67039	67097	67239	67246	67266	67267	67305	67326	67375	67416	67448	67451	67578
216363	216443	217026	217138	217217	217430	217869	218203	223739	223870	223978	224139	225055	225280	225884	226539	227094	227712	228026	228550	228608	229005	229542	229841	229905	230249	230779	230863	230917	231128	231287	232087	232334	232345	232433	232539	232787	232867	233636	233833	234353	235044	235047	235281	235534	236920	237246	239510	240590	240750
Number of genes selected : 386
Total number of genes in annotation : 10855
GO-ID	p-value	corr p-value# selected	# total	Description	Genes in test set
8151	1.2331e-05	0.011394	296	7262	cellular physiological process	216233|12116|225055|72027|50505|50708|140557|94091|328329|72168|14170|20181|22271|229542|68024|55948|74551|12334|102436|17385|20185|22275|11486|209027|17387|20910|14998|27260|207165|226539|69938|13850|18741|14674|14186|66403|71175|56338|69131|14871|72017|72962|17996|16008|14283|228026|14181|12227|12226|52033|14778|20788|14776|66902|13846|107747|16002|13709|78656|67039|170677|22151|110379|20266|50…
7049	2.6522e-05	0.024507	36	489	cell cycle	16952|26965|12745|140557|20620|50878|56321|55948|17246|13006|17242|12577|53892|93737|20200|12450|12545|12449|13404|140742|14087|71175|51869|208628|72584|30948|70099|13518|19646|26417|107995|16002|77805|20130|23954|26886
[truncated: 205 more columns]

## Sheet: BiNGO day 3
File created with BiNGO (c) on 6-aug-2007 at 15:10:50
ontology: process
curator: GO
Selected ontology file : D:\Cytoscape 22\cytoscape-v2.2\plugins\BiNGO\GO_Biological_Process
Selected annotation file : D:\Cytoscape 22\cytoscape-v2.2\plugins\BiNGO\M_musculus_default
Overrepresentation
Selected statistical test : Hypergeometric test
Selected correction : Bonferroni Family-Wise Error Rate (FWER) correction
Selected significance level : 0.1
Testing option : Test cluster versus network
The selected cluster :
11464	11474	11486	11542	11576	11703	11735	11745	11752	11768	11811	11847	11857	11861	11907	11909	11932	11992	12151	12162	12226	12227	12234	12257	12292	12334	12337	12349	12443	12444	12481	12503	12577	12628	12723	12745	12751	12776	12827	12894	12933	12946	12955	12969	13034	13206	13385	13404	13417	13423
28000	28018	28042	30052	30939	30948	50505	50708	50754	50758	50762	50878	51796	52024	52033	52076	52377	52538	54159	54169	54324	54419	54563	54635	54637	54667	54723	54725	55948	55963	55990	56043	56047	56057	56228	56291	56312	56338	56350	56373	56421	56454	56526	56722	56736	57260	57261	57746	58203	58801
93721	93737	94116	94315	99326	99890	100017	100177	100198	100340	100494	100678	100900	100951	101488	102448	102545	102866	103551	103841	104001	104156	104318	104444	104570	105450	105559	105594	105670	105785	106504	106564	106757	106795	107035	107182	107373	107449	107605	107701	107767	107815	107970	107995	108000	108043	108098	108653	109284	109624
433797	433828	434050	434151	434402	434594	434610	434727	434729	434777	434782	434866	435312	435509	435513	436366	448850
Number of genes selected : 466
Total number of genes in annotation : 10855
GO-ID	p-value	corr p-value# selected	# total	Description	Genes in test set
48513	4.4993e-05	0.044588	54	725	organ development	15903|20807|12955|14172|16149|14170|15901|11576|15902|12151|13555|16852|77573|11464|14998|13717|14612|22113|18741|66978|19401|16202|12969|15431|54723|12226|12162|21825|21823|16002|108000|18423|19211|23882|15375|26965|192231|22062|22156|13404|14087|22339|14164|13653|16590|13798|19377|14609|15415|104156|14797|13423|54635|15228
[truncated: 205 more columns]

## Sheet: BiNGO day 4
File created with BiNGO (c) on 6-aug-2007 at 13:48:33
ontology: process
curator: GO
Selected ontology file : D:\Cytoscape 22\cytoscape-v2.2\plugins\BiNGO\GO_Biological_Process
Selected annotation file : D:\Cytoscape 22\cytoscape-v2.2\plugins\BiNGO\M_musculus_default
Overrepresentation
Selected statistical test : Hypergeometric test
Selected correction : Bonferroni Family-Wise Error Rate (FWER) correction
Selected significance level : 0.1
Testing option : Test cluster versus network
The selected cluster :
11409	11416	11474	11486	11519	11520	11610	11614	11703	11739	11745	11752	11768	11782	11803	11811	11847	11857	11907	11909	11910	11989	11992	12116	12151	12162	12166	12224	12226	12227	12257	12292	12306	12310	12334	12337	12349	12351	12359	12361	12444	12450	12484	12512	12545	12558	12577	12628	12649	12703
18972	18974	19072	19124	19141	19143	19193	19202	19261	19317	19401	19653	19655	19725	19730	19820	19821	19934	20130	20166	20181	20187	20194	20195	20200	20226	20239	20257	20266	20287	20316	20392	20393	20431	20466	20469	20482	20499	20535	20539	20588	20648	20671	20688	20720	20730	20740	20755	20817	20849
67092	67097	67103	67168	67216	67239	67246	67267	67270	67308	67326	67369	67375	67448	67451	67455	67464	67512	67563	67752	67800	67812	67851	67856	67867	67880	67886	67967	67968	67996	68021	68024	68028	68047	68067	68205	68236	68283	68347	68377	68539	68559	68567	68628	68678	68729	68738	68797	68953	68971
110648	110749	111175	114714	116871	116891	117198	121022	140557	140858	170716	171202	171205	171388	171567	171580	192113	192170	192196	192199	192970	193452	194231	195555	207213	207278	207792	207839	207920	208518	208643	208836	209018	209027	209478	209837	210044	210126	210544	210982	211896	212114	212285	212439	212503	212727	213019	213051	213109	213484
433762	433777	433820	433828	434050	434151	434178	434251	434594	434610	434727	434729	435312	435584	435818	435879	436419	448850	494544
Number of genes selected : 639
Total number of genes in annotation : 10855
GO-ID	p-value	corr p-value# selected	# total	Description	Genes in test set
8152	1.7718e-07	0.0002096	374	5286	metabolism	12116|83703|55942|50505|243853|50708|15945|23792|94091|18643|20431|68028|12337|18642|14275|20181|22271|68024|74551|12334|16600|17385|27267|68021|20187|14584|11486|104884|15425|18647|209027|17387|14998|56736|19202|226539|14375|24074|13850|18741|14683|66403|20817|21427|110173|16202|56338|20588|14871|72017|67031|14183|14283|22689|228026|72157|71887|14181|12349|12224|14281|15431|12227|52033|12226|147…
44237	3.1549e-07	0.00037322	354	4969	cellular metabolism	12116|83703|55942|50505|243853|50708|15945|23792|94091|18643|20431|68028|12337|18642|14275|20181|22271|68024|74551|12334|16600|17385|27267|68021|20187|14584|11486|104884|15425|18647|209027|17387|14998|56736|19202|226539|14375|24074|13850|18741|14683|66403|20817|21427|110173|16202|56338|20588|14871|72017|67031|14183|14283|22689|228026|71887|14181|12349|12224|14281|15431|12227|52033|12226|14778|222…
6139	9.8956e-07	0.0011707	180	2221	nucleobase, nucleoside, nucleotide and nucleic acid metabolism	15081|83703|55942|50505|50708|50796|18643|14912|21372|17701|17702|20181|22271|68024|66277|12913|16600|27267|319157|13555|93691|11486|104884|15425|17219|56736|19202|233490|24074|14375|319153|18741|19401|66403|20817|21427|114714|20588|67031|16478|14283|22689|14181|12224|14106|23849|14281|15431|12227|18025|12226|116871|22286|66902|16476|22702|13709|16764|22596|24086|67039|14200|17537|21416|210044|14…
6334	1.1423e-06	0.0013513	14	52	nucleosome assembly	15081|66403|319180|97114|50708|68024|54169|69386|319157|52076|319187|319183|319153|319185
8151	1.3157e-06	0.0015565	481	7262	cellular physiological process	14175|55942|243853|50708|15945|23792|140557|94091|20431|14275|20181|55948|16905|16600|17385|27267|20187|14584|11486|17387|12725|20910|218756|14998|19202|226539|14375|24074|13850|14683|16009|20817|21427|66403|110173|16202|20588|14871|16007|67031|14183|14283|14181|71887|14281|52033|14778|27279|69672|16002|13709|24086|67039|21416|14154|20266|14155|66515|50878|15925|52024|13835|12703|67996|20755|1297…
31497	1.6772e-06	0.0019841	15	61	chromatin assembly	15081|66403|319180|97114|50708|68024|54169|69386|319157|52076|64384|319187|319183|319153|319185
50791	2.0331e-06	0.0024052	175	2169	regulation of physiological process	56191|14175|216233|55942|16952|50796|18643|14912|21372|17701|66889|17702|20181|66277|55948|12913|16600|13555|93691|15425|17219|14998|56736|19202|233490|24074|76281|18741|16009|19401|21427|16202|20588|16007|14183|16478|22689|14283|23849|14181|14106|12224|14281|15431|12227|18025|12226|116871|22286|56441|22702|16002|16476|13709|16764|14200|227753|17537|21416|14154|76572|66515|14155|58801|52024|54169…
44238	3.2885e-06	0.0038903	335	4747	primary metabolism	12116|83703|55942|50505|243853|50708|23792|94091|18643|20431|68028|12337|18642|20181|22271|68024|74551|16600|12334|17385|27267|20187|14584|11486|104884|15425|18647|209027|17387|14998|56736|19202|226539|14375|24074|18741|66403|20817|21427|110173|16202|20588|67031|14183|14283|22689|228026|72157|71887|14181|12224|14281|15431|12227|52033|12226|22286|66902|13709|24086|67039|21416|14154|66515|14155|159…
51244	4.1324e-06	0.0048886	169	2102	regulation of cellular physiological process	56191|14175|216233|55942|16952|50796|18643|14912|21372|17701|66889|17702|20181|66277|55948|12913|16600|13555|93691|15425|17219|14998|56736|19202|233490|24074|76281|18741|16009|19401|21427|16202|20588|16007|14183|16478|22689|14283|23849|14181|14106|12224|14281|15431|12227|18025|12226|116871|22286|56441|22702|16002|16476|13709|16764|14200|227753|17537|21416|14154|76572|66515|14155|58801|52024|54169…
6333	5.2241e-06	0.0061801	17	83	chromatin assembly or disassembly	15081|66403|319180|20588|97114|50708|68024|54169|69386|319157|52076|64384|319187|75339|319183|319153|319185
9887	5.5496e-06	0.0065652	44	369	organ morphogenesis	14175|15903|14254|26965|15394|13642|14912|67451|15901|15902|20187|319939|15425|15110|22420|22422|22423|22113|12306|18741|13404|19317|14087|14367|20588|16007|14164|14183|14106|12224|15431|12226|27279|12162|14609|21825|56744|13867|15415|26417|104156|16002|12558|54635
48513	6.387e-06	0.0075558	72	725	organ development	14175|15903|12955|15394|286940|14912|17701|140858|67451|15901|15902|12151|13555|16852|20187|319939|15425|14998|15110|22420|22422|22423|22113|12306|18741|66978|19401|19317|16202|20588|16007|14183|14633|14106|12224|15431|12166|12226|27279|12162|21825|56744|26417|65100|12558|16002|20648|98932|94245|23882|14254|26965|13642|11519|22062|13404|11803|14087|14367|14164|13653|16590|13798|14609|13867|15415|…
50794	6.5721e-06	0.0077748	175	2209	regulation of cellular process	56191|14175|216233|55942|16952|50796|18643|14912|21372|17701|66889|17702|20181|66277|55948|12913|16600|13555|93691|15425|17219|14998|56736|19202|233490|24074|76281|18741|16009|19401|21427|16202|20588|16007|14183|16478|22689|14283|23849|14181|14106|12224|14281|15431|12227|18025|12226|116871|22286|56744|56441|22702|16002|16476|13709|16764|14200|227753|17537|21416|14154|76572|66515|14155|58801|52024…
50789	1.198e-05	0.014172	185	2384	regulation of biological process	56191|14175|216233|55942|16952|50796|18643|21372|14912|17701|66889|17702|20181|66277|55948|12913|16600|13555|93691|19141|15425|17219|14998|56736|19202|233490|24074|76281|18741|16009|19401|21427|16202|20588|16007|14183|16478|22689|14283|23849|14181|14106|12224|14281|15431|12227|18025|12226|116871|27279|22286|56744|56441|22702|16002|16476|13709|16764|14200|227753|17537|21416|210044|14154|76572|6651…
9653	1.2539e-05	0.014833	68	686	morphogenesis	56191|14175|15903|216233|13590|73178|15394|18643|17886|14912|17701|17702|67451|15901|15902|20187|319939|15425|20910|15110|22420|22422|22423|22113|12306|18741|16009|19317|16202|20588|16007|14183|14106|12224|15431|12226|27279|12162|21825|56744|26417|65100|12558|16002|16476|14254|26965|13642|12703|20755|13404|12808|14087|14367|16911|14164|13798|14609|110648|13867|15415|104156|74202|54635|22436|14360…
6259	1.597e-05	0.018893	46	409	DNA metabolism	15081|97114|50505|12649|28000|50708|18971|18972|68024|18974|12151|319157|54169|104884|17219|14375|13436|13435|319153|69270|13404|22040|110749|66403|14087|319180|114714|56878|20588|15364|69386|18969|18968|52076|67967|64384|13423|319187|272551|75339|70603|319183|22596|320890|24086|319185
7275	2.2017e-05	0.026046	129	1560	development	56191|14175|216233|50796|18643|17886|14912|17701|17702|20195|13555|16852|20187|15425|20910|14998|18412|22113|18741|66978|16009|19401|20817|16202|20588|16007|14183|14106|12224|14281|15431|12227|54725|12226|27279|21825|56744|16002|16476|20648|24086|12703|226049|22062|20755|13164|13436|13435|13404|12808|21407|14087|14367|16911|14164|13798|13619|14609|110648|15415|22003|13423|14360|15228|13175|18516|…
[truncated: 205 more columns]
