# Supplementary material for: Ubiquitin E3 Ligase Ring1b/Rnf2 of Polycomb Repressive Complex 1 Contributes to Stable Maintenance of Mouse Embryonic Stem Cells
Source: PLoS One. 2008 May 21;3(5):e2235. doi: 10.1371/journal.pone.0002235 (PMC2375055; doi:10.1371/journal.pone.0002235)
Supplement: Table S3 — Pathway analysis of genes transcriptionally deregulated following Ring1b deletion. Excel file of DAVID pathway analysis (selecting the KEGG pathway database option) of all outliers, based on EntrezIDs, per day of 4-OHT treatment of Ring1b-/Lox;CreERT2 ES cells. (0.02 MB XLS) [file pone.0002235.s006.xls]

## Sheet: DAVID analysis reports
Term (based on KEGG pathway database)	Count	%	PValue	Genes (EntrezID)
Day 1
MMU04110:CELL CYCLE	8	0.0174	0.0395295	50883, 12448, 140557, 23882, 26965, 12577, 218294, 18817,
MMU00051:FRUCTOSE AND MANNOSE METABOLISM	6	0.013	0.0207273	21991, 20322, 14187, 54128, 11674, 14120,
MMU00710:CARBON FIXATION	4	0.0087	0.0305005	21991, 18655, 11674, 14120,
MMU00030:PENTOSE PHOSPHATE PATHWAY	4	0.0087	0.037932	72157, 19139, 11674, 14120,
MMU00010:GLYCOLYSIS / GLUCONEOGENESIS	6	0.013	0.0256999	21991, 18655, 13808, 72157, 11674, 14120,
Day 2
MMU00330:ARGININE AND PROLINE METABOLISM	6	0.0093	0.0590594	11847, 107508, 109900, 72535, 18451, 209027,
MMU00480:GLUTATHIONE METABOLISM	5	0.0078	0.093433	14778, 14776, 14871, 67305, 14873,
MMU00271:METHIONINE METABOLISM	4	0.0062	0.0181644	216443, 12116, 13435, 232087,
MMU04520:ADHERENS JUNCTION	8	0.0124	0.0259498	22330, 73178, 26417, 29875, 11474, 380928, 71740, 108100,
MMU00010:GLYCOLYSIS / GLUCONEOGENESIS	6	0.0093	0.0629227	18655, 72157, 72535, 56421, 13807, 14120,
MMU00590:ARACHIDONIC ACID METABOLISM	7	0.0109	0.0711108	14778, 14776, 13850, 18782, 67305, 109857, 26565,
MMU00970:AMINOACYL-TRNA SYNTHETASES	5	0.0078	0.021118	216443, 102436, 107271, 107508, 226539,
MMU00220:UREA CYCLE AND METABOLISM OF AMINO GROUPS	4	0.0062	0.0836415	11847, 109900, 56454, 209027,
MMU04730:LONG-TERM DEPRESSION	7	0.0109	0.0747832	14674, 53623, 18798, 26417, 20130, 18782, 26565,
Day 3
MMU04540:GAP JUNCTION	9	0.0115	0.058752	54635, 14609, 20130, 16438, 210044, 18176, 14745, 104318, 14784,
MMU00910:NITROGEN METABOLISM	5	0.0064	0.0170278	216456, 12349, 71934, 15109, 14645,
MMU04510:FOCAL ADHESION	17	0.0217	0.032601	216148, 12337, 20130, 12444, 21825, 22793, 14784, 12443, 54635, 19211, 11474, 12334, 12827, 18176, 16202, 22339, 11464,
MMU04350:TGF-BETA SIGNALING PATHWAY	9	0.0115	0.0445196	13590, 15902, 18741, 18119, 26965, 15901, 12162, 21825, 15903,
Day 4
MMU04110:CELL CYCLE	13	0.0126	0.0486471	12545, 23882, 12444, 12649, 140557, 217232, 13197, 12577, 26965, 55948, 107995, 17219, 68999,
MMU00340:HISTIDINE METABOLISM	7	0.0068	0.0766397	56441, 54673, 54169, 72535, 67011, 214572, 15186,
MMU03030:DNA POLYMERASE	6	0.0058	0.0308312	18968, 18974, 18971, 18972, 67967, 18969,
MMU00280:VALINE, LEUCINE AND ISOLEUCINE DEGRADATION	9	0.0087	0.0206382	56441, 54673, 54169, 15108, 72535, 11992, 52538, 11409, 104776,
MMU00030:PENTOSE PHOSPHATE PATHWAY	6	0.0058	0.0226188	72157, 110639, 14121, 56421, 18642, 14120,
MMU00271:METHIONINE METABOLISM	4	0.0039	0.07396	216443, 12116, 13435, 13436,
MMU00260:GLYCINE, SERINE AND THREONINE METABOLISM	8	0.0077	0.046524	19193, 100678, 12116, 67092, 20226, 107272, 18618, 56043,
MMU00010:GLYCOLYSIS / GLUCONEOGENESIS	8	0.0077	0.0772364	18655, 68738, 72157, 72535, 14121, 56421, 18642, 14120,
MMU00564:GLYCEROPHOSPHOLIPID METABOLISM	11	0.0106	0.0284319	56441, 54673, 54169, 52858, 53357, 18618, 67512, 18784, 13139, 56043, 26565,
MMU04350:TGF-BETA SIGNALING PATHWAY	12	0.0116	0.0267173	110542, 13590, 15902, 18741, 18119, 26965, 26417, 15901, 12162, 12166, 21825, 15903,
MMU00970:AMINOACYL-TRNA SYNTHETASES	6	0.0058	0.0355554	216443, 107271, 226539, 27267, 20226, 70223,
MMU04320:DORSO-VENTRAL AXIS FORMATION	6	0.0058	0.0522887	26417, 20130, 23872, 12877, 18176, 57746,
